# Supplementary material for: Polymer-derived carbon nanofiber network supported SnO2 nanocrystals: a superior lithium secondary battery material
Source: Royal Society of Chemistry journal article supplement (doi:10.1039/c1jm12262b), 2011-01-01
Supplement: c1jm12262b.pdf [file c1jm12262b.pdf]

## Supplementary Information

**Table S1** The morphologies of PPy obtained under different polymerization conditions

| Polymerization condition |                  |            |                  | Morphology |
|--------------------------|------------------|------------|------------------|------------|
| Py concentration         | Media            | Surfactant | Temperature      |            |
| 0.03 M                   | 0.2 M HCl        | CTAB       | 0–5 °C           | Fibers     |
| 0.03 M                   | 0.2 M HCl        | CTAB       | Room temperature | Particles  |
| 0.03 M                   | 0.2 M HCl        | None       | 0–5 °C           | particles  |
| 0.03 M                   | CCl <sub>4</sub> | CTAB       | 0–5 °C           | particles  |
| 0.03 M                   | 0.6 M HCl        | CTAB       | 0–5 °C           | Fibers     |
| 0.03 M                   | 1.2 M HCl        | CTAB       | 0–5 °C           | Fibers     |
| 0.015 M                  | 0.2 M HCl        | CTAB       | 0–5 °C           | Fibers     |
